# Supplementary material for: Bioactive herbal supramolecular hydrogels with a hierarchical nanofibrillar structure via metal ion mediated co-assembly
Source: Royal Society of Chemistry journal article supplement (doi:10.1039/d5nr02063h), 2025-01-01
Supplement: d5nr02063h1.pdf [file d5nr02063h1.pdf]

**Supplementary Information**

**Bioactive herbal supramolecular hydrogels with a hierarchical  
nanofibrillar structure via metal ion mediated co-assembly**

Xinke Yu <sup>a</sup>, Sili Liu <sup>a</sup>, Zhili Wan <sup>a,b,\*</sup> and Xiaoquan Yang <sup>a</sup>

<sup>a</sup> Laboratory of Food Proteins and Colloids, School of Food Science and Engineering, Guangdong  
Province Key Laboratory for Green Processing of Natural Products and Product Safety, South China  
University of Technology, Guangzhou 510640, China

<sup>b</sup> Overseas Expertise Introduction Center for Discipline Innovation of Food Nutrition and Human  
Health (111 Center), Guangzhou 510640, China

Submitted to: *Nanoscale*

\*Corresponding author: Zhili Wan

E-mail: zhiliwan@scut.edu.cn

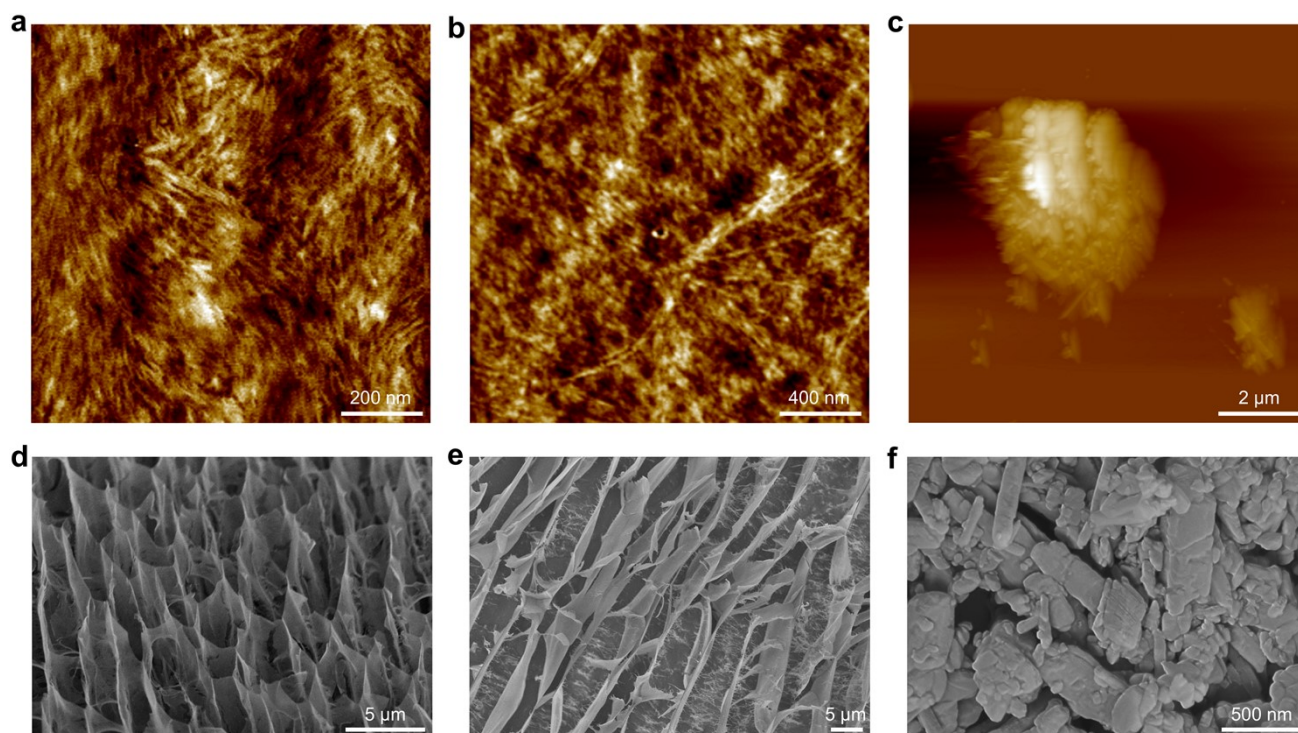

**Fig. S1** AFM height images of (a) GA, (b) GA-Zn, and (c) Rh<sub>1</sub>. Cryo-SEM images of (d) GA, (e) GA-Zn, and (f) Rh<sub>1</sub>.

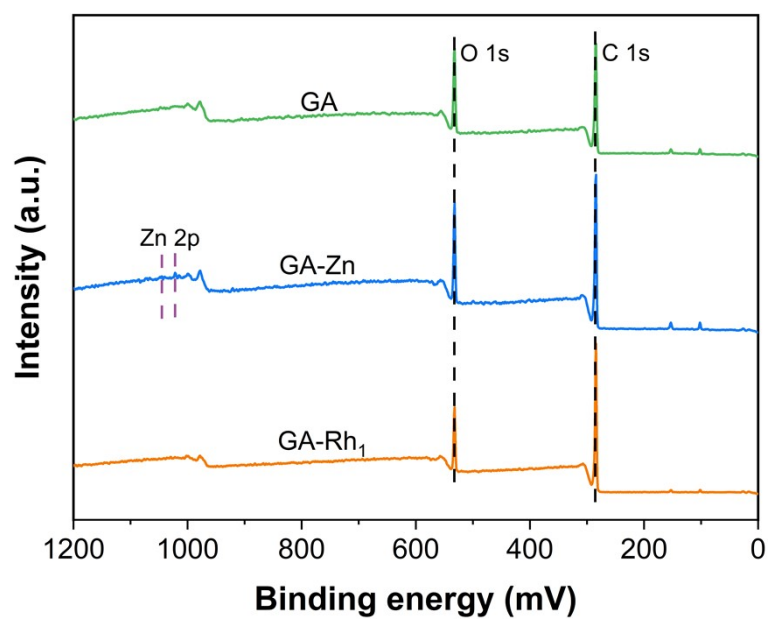

24 **Fig. S2** XPS survey spectra of GA-Zn-Rh hydrogels.

25

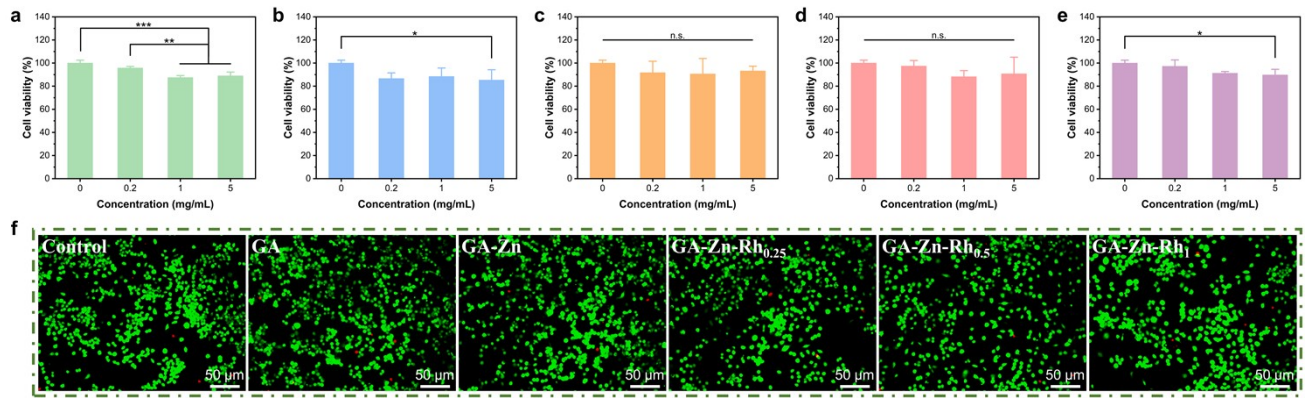

26 **Fig. S3** *In vitro* biocompatibility and anti-inflammation ability of GA-Zn-Rh hydrogels. (a-e) Viability  
 27 of RAW264.7 cells incubated with GA-Zn-Rh hydrogel extract liquids at different concentrations (0,  
 28 0.2, 1, and 5 mg/mL) for 24 h by MTT assay: (a) GA, (b) GA-Zn, (c) GA-Zn-Rh<sub>0.25</sub>, (d) GA-Zn-Rh<sub>0.5</sub>,  
 29 and (e) GA-Zn-Rh<sub>1</sub>. (f) Live/dead fluorescence staining images of RAW264.7 cells incubated with  
 30 hydrogel extract liquids (5 mg/mL) for 24 h.
